# Supplementary material for: Enhancement of antimicrobial and structural properties of PVA packaging films using neem leaf powder: an example for extending the shelf life of cowpeas
Source: Royal Society of Chemistry journal article supplement (doi:10.1039/d5ra05486a), 2025-01-01
Supplement: d5ra05486a3.pdf [file d5ra05486a3.pdf]

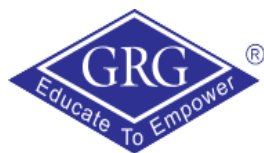

**GRG Food Quality Testing Laboratory**  
(A unit of PSGR Krishnammal College for Women, GRG Trust)

Peelamedu, Coimbatore- 641004. Phone: +91 -7845802665

Website: www.grgfqtl.in Email: grgfqtl@psgrkcw.ac.in, labheadfqt@psgrkcw.ac.in

## TEST REPORT

| ULR No.               | NA                                                                                                                      | Report No.                   | GRGFQTL/NN/24/00129 | Report Date. | 14.10.2024 |
|-----------------------|-------------------------------------------------------------------------------------------------------------------------|------------------------------|---------------------|--------------|------------|
| Customer Name         | : N.Abinaya                                                                                                             |                              |                     |              |            |
| Customer Address      | : Research Scholar - Department of Chemistry<br>Kalasalingam Academic of Research and Education<br>Krishnakoil - 626126 |                              |                     |              |            |
| Sample Name           | : PN4                                                                                                                   | Sample Description           | : -                 |              |            |
| Sample Code           | : G241000007                                                                                                            | Sample Received on           | : 07.10.2024        |              |            |
| Sample Drawn by       | : Customer                                                                                                              | Sample Marking (By Customer) | : NA                |              |            |
| Sample Quantity       | : 1 No                                                                                                                  | Analysis Started on          | : 07.10.2024        |              |            |
| Analysis Completed on | : 10.10.2024                                                                                                            | Technical Reference          | : NA                |              |            |
| Discipline            | : Biology                                                                                                               | Group                        | : NA                |              |            |

### Antimicrobial Activity Results

| Sl.No | Name of the Sample | Test Organism           | Zone of Inhibition |
|-------|--------------------|-------------------------|--------------------|
| 1     | PN4                | <i>Escherichia coli</i> | 15 mm              |

\*\*\*End of Report\*\*\*

1 of 2

The results are applicable only to submitted sample(s). The remnant sample(s) will be retained for 7 days after the completion of testing; except for regulatory sample(s) which will be retained for a specific period as per the statutory requirement. The sample shall be preserved upon the request by the customer, while perishable sample(s) will be discarded after the completion of testing. The samples are not drawn by us unless otherwise stated. This test report shall not be reproduced in part or full and cannot be used as evidence in a court of law without prior written permission from the laboratory. Under no circumstances laboratory accepts any liability or damage that are caused by use or misuse of the test report.

*Escherichia coli*

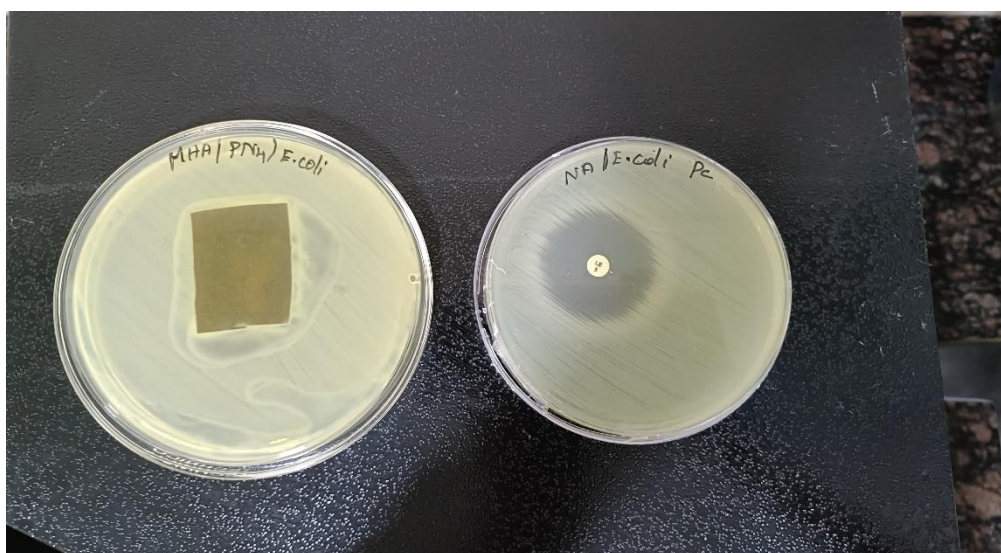

For GRG FQTL

R. Ammukanaga

Authorized Signatory

Name: R.Ammukanaga

Designation: Senior Microbiologist

\*\*\*End of Report\*\*\*

2 of 2

The results are applicable only to submitted sample(s). The remnant sample(s) will be retained for 7 days after the completion of testing; except for regulatory sample(s) which will be retained for a specific period as per the statutory requirement. The sample shall be preserved upon the request by the customer, while perishable sample(s) will be discarded after the completion of testing. The samples are not drawn by us unless otherwise stated. This test report shall not be reproduced in part or full and cannot be used as evidence in a court of law without prior written permission from the laboratory. Under no circumstances laboratory accepts any liability or damage that are caused by use or misuse of the test report.
