# Supplementary material for: Enhancement of antimicrobial and structural properties of PVA packaging films using neem leaf powder: an example for extending the shelf life of cowpeas
Source: Royal Society of Chemistry journal article supplement (doi:10.1039/d5ra05486a), 2025-01-01
Supplement: d5ra05486a4.pdf [file d5ra05486a4.pdf]

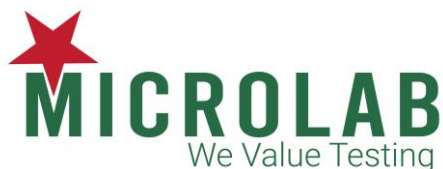

D25, Ambattur Industrial Estate, Chennai – 600058.  
Ph: 044-26242525/044-61740800  
Email: [cre@microlabtesting.com](mailto:cre@microlabtesting.com)  
Web: [www.microlabtesting.com](http://www.microlabtesting.com)

**TEST REPORT**

|                                                                                                                                                                        |                    |                                                               |
|------------------------------------------------------------------------------------------------------------------------------------------------------------------------|--------------------|---------------------------------------------------------------|
| <b>Customer:</b><br><b>S. Tamil Anand</b><br><b>Research Scholar,</b><br><b>Kalasalingam Academy of Research</b><br><b>and Educaton</b><br><b>Krishnankoil- 626126</b> | Report No / Date   | MTPL/2416A/1/25-26/Dt: 21 Apr 2025                            |
|                                                                                                                                                                        | Your ref./ Date    | Letter / Dt: 15 Apr 2025                                      |
|                                                                                                                                                                        | Our ref./ Date     | TOCR: 2416A/25-26/Dt: 16 Apr 2025                             |
|                                                                                                                                                                        | Date of Testing    | 16 Apr 2025 – 21 Apr 2025                                     |
|                                                                                                                                                                        | Sample Drawn By    | Customer Specification                                        |
|                                                                                                                                                                        | Sample Description | Thin Film<br>Size: 150 mm Length , 15 mm Breath<br>Qty: 6 Nos |

**Tensile Strength**

| Test Parametr                                    | ID-1   | ID-2  | ID-3  | ID-4  | ID-5  | ID-6  | Average |
|--------------------------------------------------|--------|-------|-------|-------|-------|-------|---------|
| <b>Tensile Strength</b><br><b>(Mpa)</b>          | 0.18   | 0.04  | 0.046 | 0.208 | 0.692 | 18.82 | 3.33    |
| <b>Elongation at Break (%)</b>                   | 106.96 | 22.66 | 22.40 | 10.84 | 3.78  | 20.54 | 31.19   |
| <b>Standard deviation of Tensile Strength</b>    | 0.028  | 0.018 | 0.005 | 0.116 | 0.054 | 5.284 | 0.91    |
| <b>Standard deviation of Elongation at Break</b> | 27.27  | 4.18  | 3.07  | 4.04  | 0.45  | 7.36  | 7.72    |

**Verified by: Govindarajilu**

**For MICROLAB**

**B. Sudharsan Head - Technical**  
**Authorized Signatory**

-----End of the test report-----
